# Supplementary material
Source: PubMed Central journal article supplement (PMC7473786)
Supplement: NIHMS1622537-supplement-SM.pdf [file NIHMS1622537-supplement-SM.pdf]

## Supporting Information

### **<sup>64</sup>Cu-Labeled multifunctional dendrimers for targeted PET imaging of tumors**

Wenhui Ma,<sup>†a,b</sup> Fanfan Fu,<sup>†c</sup> Jingyi Zhu,<sup>d</sup> Rui Huang,<sup>a</sup> Yizhou Zhu,<sup>a</sup> Zhenwei Liu,<sup>a</sup>  
Jing Wang,<sup>b</sup> Peter S. Conti,<sup>a</sup> Xiangyang Shi <sup>\*,c,d</sup> and Kai Chen <sup>\*,a</sup>

<sup>a</sup> *Molecular Imaging Center, Department of Radiology, Keck School of Medicine, University of Southern California, Los Angeles, CA 90033, USA*

<sup>b</sup> *Department of Nuclear Medicine, Xijing Hospital, The Fourth Military Medical University, Xi'an, Shaanxi 710032, PR China*

<sup>c</sup> *College of Chemistry, Chemical Engineering and Biotechnology, Donghua University, Shanghai 201620, PR China*

<sup>d</sup> *State Key Laboratory for Modification of Chemical Fibers and Polymer Materials, College of Materials Science and Engineering, Donghua University, Shanghai 201620, PR China*

<sup>†</sup> These authors contributed equally to this work.

\* Corresponding authors. Molecular Imaging Center, Department of Radiology, Keck School of Medicine, University of Southern California, Los Angeles, CA 90033, USA. Tel.: +1 323 442 3858; Fax: +1 323 442 3253 (K. Chen). College of Chemistry, Chemical Engineering and Biotechnology, Donghua University, Shanghai 201620, P. R. China. Tel.: +86 21 67792656; Fax: +86 21 67792306 804 (X. Shi).

*E-mail addresses:* [chenkai@med.usc.edu](mailto:chenkai@med.usc.edu) (K. Chen), [xshi@dhu.edu.cn](mailto:xshi@dhu.edu.cn) (X. Shi).

**Table S1.** Radio-TLC condition and result.

| Eluent                             | TLC phase | R <sub>f</sub> |                                                |
|------------------------------------|-----------|----------------|------------------------------------------------|
|                                    |           | Cu-64          | <sup>64</sup> Cu-DOTA-FA-FI-G5.NHAc dendrimers |
| 10% NH <sub>4</sub> OAc:MeOH (1:1) | Normal    | 0.8 (EDTA)     | 0                                              |

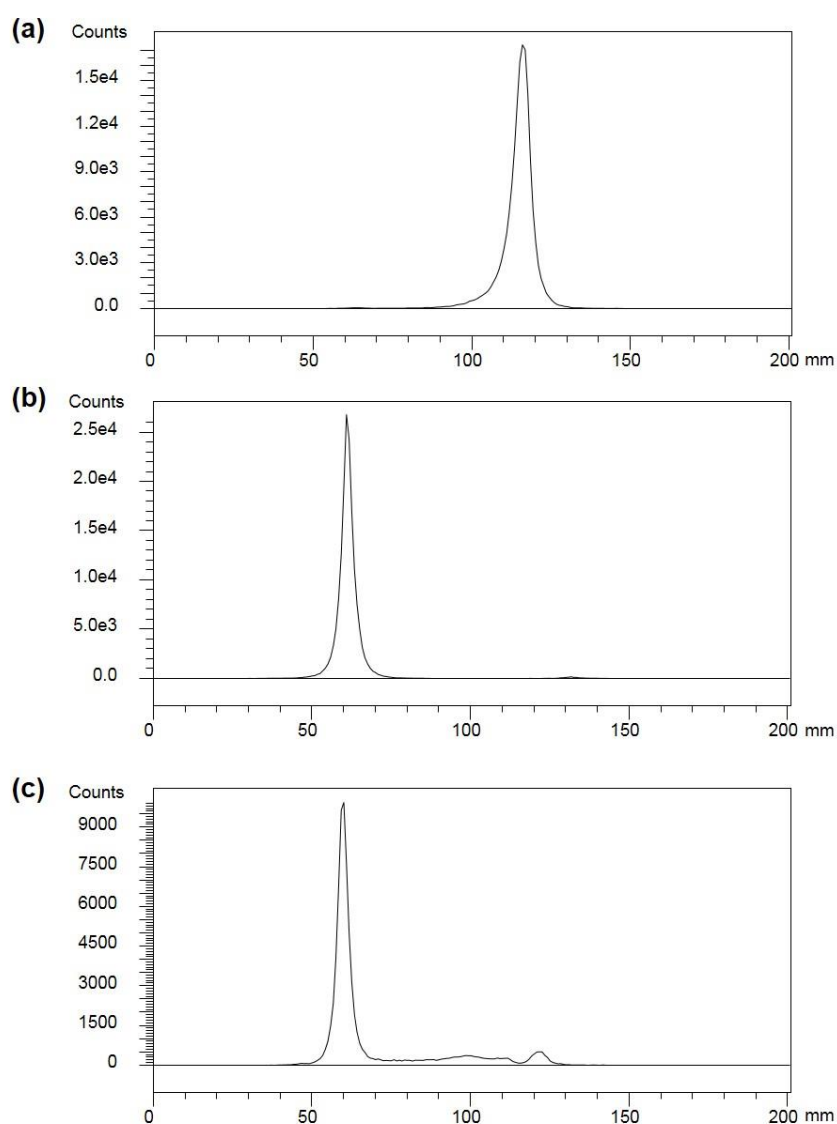

**Figure S1.** Radiochemical purity of <sup>64</sup>CuCl<sub>2</sub> (a) and the formed <sup>64</sup>Cu-DOTA-FA-FI-G5.NHAc dendrimers at (b) 0 h and (c) 20 h in mouse serum at 37°C.
